# Supplementary material
Source: ML conference proceedings conference paper supplement (https://openreview.net/forum?id=7arAADUK6D)
Supplement: supplementary_material [file attachment]

# DeePEN Code Usage Instructions

---

## Preparation Stage

### Model Download

All models used in this program are open-source and can be downloaded from Huggingface.

### Relative Representation Matrix Construction

To construct the relative representation matrix, use the following command:

```
▼ Bash |  
1 python src/transfer_matrix_save.py
```

### Configuration File Setup

Based on the examples in the `confs` folder, fill in the configuration file according to the task requirements, the model, and the newly constructed relative representation matrix.

The configuration file should include the following fields:

- `model_path` : Path to the model
- `probability_transfer_matrix_path` : Path to the relative representation matrix constructed in the previous step
- `file_path` : Paths to the example prompt and the validation and test datasets
- `prompt_template` : Prompt template
- `result_process_parameter` : Post-processing operation parameters

## Execution Stage

For a four-model ensemble, run the TriviaQA test with the following script:

```
1  CUDA_VISIBLE_DEVICES=0,1 python src/main_4ensemble_llama_series_local_matrix.py \
2  --config confs/G0003/TriviaQA/LLaMA+Mistral+InternLM+Tigerbot.json \
3  -lpm based_on_probility_transfer_logits_local_reweight_processor \
4  -d0 cuda:0 -d1 cuda:0 -d2 cuda:1 -d3 cuda:1 -dp cuda:0 \
5  -rsd eval/TriviaQA_old_version_0506/LLaMA+Mistral+InternLM+Tigerbot/reweight/test \
6  -rm test \
7  -lr 0.2
```

Where:

- `-lpm` : Model ensemble strategy, detailed in `src/logits_processor/model_processor_factory.py`
- `-rsd` : Result storage path
- `-rm` : Running mode, either `dev` or `test`
- `-lr` : Learning rate

## Testing Stage

To perform testing, use the following command:

```
1  python utils/evaluate/NQ_dir_test.py eval/TriviaQA_old_version_0506/LLaMA+Mistral+InternLM+Tigerbot/reweight/test
```

Result:

```
1  Found 0 missing predictions.
2  Accuracy: 75.67 (4540/6000)
```
